# Supplementary material for: Secondary inorganic aerosols in Europe: sources and the significantinfluence of biogenic VOC emissions especially on ammonium nitrate
Source: Copernicus journal article supplement (doi:10.5194/acp-2016-739), 2016-08-22
Supplement: Supplementary file 1 [file acp-2016-739-supplement.pdf]

## Supplementary Material

Table S1: Reactions and rate constants for biogenic BVOC in the CB05 mechanism (ENVIRON, 2011)

| Isoprene reactions       | Reaction products                                                                                                       | $k_{298}$<br>( $\text{ppm}^{-n}\text{min}^{-1}$ ) |
|--------------------------|-------------------------------------------------------------------------------------------------------------------------|---------------------------------------------------|
| ISOP + O                 | 0.75 ISPD + 0.5 FORM + 0.25 XO2 + 0.25 HO2 + 0.25 CXO3 + 0.25 PAR                                                       | 5.318E+04                                         |
| ISOP+OH                  | 0.912 ISPD + 0.629 FORM + 0.991 XO2 + 0.912 HO2 + 0.088 XO2N                                                            | 1.473E+05                                         |
| ISOP + O3                | 0.65 ISPD + 0.6 FORM + 0.2 XO2 + 0.066 HO2 + 0.266 OH + 0.2 CXO3 + 0.15 ALDX + 0.35 PAR + 0.066 CO                      | 1.898E-02                                         |
| ISOP+NO3                 | 0.2 ISPD + 0.8 NTR + XO2 + 0.8 HO2 + 0.2 NO2 + 0.8 ALDX + 2.4 PAR                                                       | 9.954E+02                                         |
| ISOP + NO2               | 0.2 ISPD + 0.8 NTR + XO2 + 0.8 HO2 + 0.2 NO + 0.8 ALDX + 2.4 PAR                                                        | 2.216E-04                                         |
| ISPD+OH                  | 1.565 PAR + 0.167 FORM + 0.713 XO2 + 0.503 HO2 + 0.334 CO + 0.168 MGLY + 0.252 ALD2 + 0.21 C2O3 + 0.25 CXO3 + 0.12 ALDX | 4.963E+04                                         |
| ISPD + O3                | 0.114 C2O3 + 0.15 FORM + 0.85 MGLY + 0.154 HO2 + 0.268 OH + 0.064 XO2 + 0.02 ALD2 + 0.36 PAR + 0.225 CO                 | 1.049E-02                                         |
| ISPD+NO3                 | 0.357 ALDX + 0.282 FORM + 1.282 PAR + 0.925 HO2 + 0.643 CO + 0.85 NTR + 0.075 CXO3 + 0.075 XO2 + 0.15 HNO3              | 1.477E+00                                         |
| ISPD                     | 0.333 CO + 0.067 ALD2 + 0.9 FORM + 0.832 PAR + 1.033 HO2 + 0.7 XO2 + 0.967 C2O3                                         | photolysis                                        |
| <b>Terpene reactions</b> |                                                                                                                         |                                                   |
| TERP + O                 | 0.15 ALDX + 5.12 PAR                                                                                                    | 5.318E+04                                         |
| TERP+OH                  | 0.75 HO2 + 1.25 XO2 + 0.25 XO2N + 0.28 FORM + 1.66 PAR + 0.47 ALDX                                                      | 9.997E+04                                         |
| TERP + O3                | 0.57 OH + 0.07 HO2 + 0.76 XO2 + 0.18 XO2N + 0.24 FORM + 0.001 CO + 7 PAR + 0.21 ALDX + 0.39 CXO3                        | 1.128E-01                                         |
| TERP+NO3                 | 0.47 NO2 + 0.28 HO2 + 1.03 XO2 + 0.25 XO2N + 0.47 ALDX + 0.53 NTR                                                       | 9.833E+03                                         |

|      |                                                                   |
|------|-------------------------------------------------------------------|
| OH   | Hydroxyl radical                                                  |
| HO2  | Hydroperoxy radical                                               |
| NO2  | Nitrogen dioxide                                                  |
| NO3  | Nitrate radical                                                   |
| HNO3 | Nitric acid                                                       |
| NTR  | Organic nitrate (RNO <sub>3</sub> )                               |
| CO   | Carbon monoxide                                                   |
| FORM | Formaldehyde                                                      |
| ALD2 | Acetaldehyde                                                      |
| ALDX | Propionaldehyde and higher aldehydes                              |
| PAR  | Paraffin carbon bond (C-C)                                        |
| XO2  | NO to NO2 conversion from alkylperoxy (RO2) radical               |
| XO2N | NO to organic nitrate conversion from alkylperoxy (RO2) radical   |
| MGLY | Methylglyoxal and other aromatic products                         |
| C2O3 | Acetylperoxy radical                                              |
| CXO3 | C3 and higher acylperoxy radicals                                 |
| ISOP | Isoprene                                                          |
| ISPD | Isoprene product (lumped methacrolein, methyl vinyl ketone, etc.) |
| TERP | Terpene                                                           |

**Table S2: Biogenic SOA precursor reactions included in CAMx (ENVIRON, 2011)**

| Precursor      | Reaction  | CG (condensable gas) products | $k_{298}$ (ppm <sup>-n</sup> min <sup>-1</sup> ) |
|----------------|-----------|-------------------------------|--------------------------------------------------|
| Isoprene       | ISP + O   | none                          | 5.32E+04                                         |
|                | ISP + OH  | 0.015 CG3 + 0.12 CG4          | 1.47E+05                                         |
|                | ISP + O3  | none                          | 1.90E-02                                         |
|                | ISP + NO3 | none                          | 9.96E+02                                         |
| Terpenes       | TRP + O   | 0.065 CG5 + 0.29 CG6          | 4.12E+04                                         |
|                | TRP + OH  | 0.065 CG5 + 0.29 CG6          | 7.76E+04                                         |
|                | TRP + O3  | 0.065 CG5 + 0.29 CG6          | 1.33E-01                                         |
|                | TRP + NO3 | 0.065 CG5 + 0.29 CG6          | 9.18E+03                                         |
| Sesquiterpenes | SQT + OH  | 0.85 CG7                      | 2.91E+05                                         |
|                | SQT + O3  | 0.85 CG7                      | 1.71E+01                                         |
|                | SQT + NO3 | 0.85 CG7                      | 2.81E+04                                         |

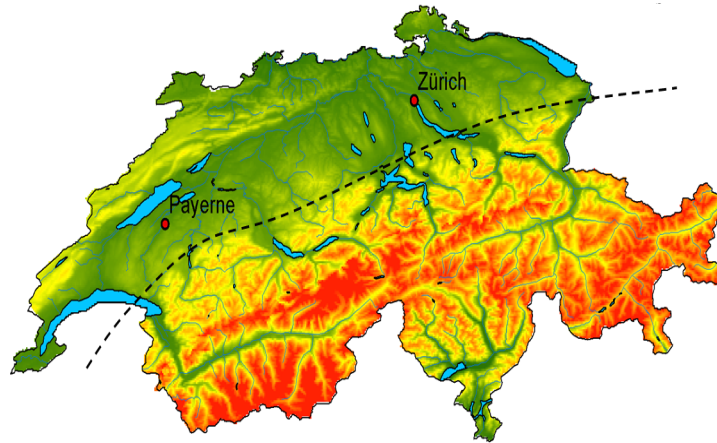

Figure S1: The Swiss Plateau (the region above the dashed line) used as receptor in PSAT calculations.

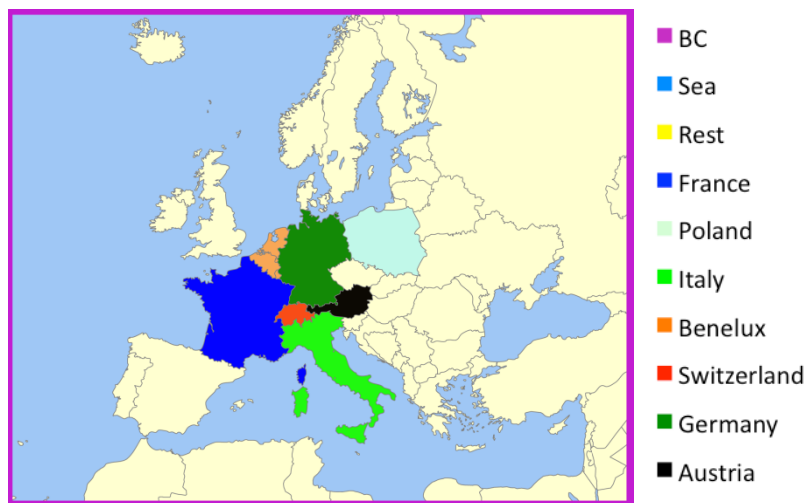

Figure S2: Source regions used in PSAT calculations. Note that this map was only used for illustration of the regions and their colors and it doesn't have the same projection used in the model simulations.

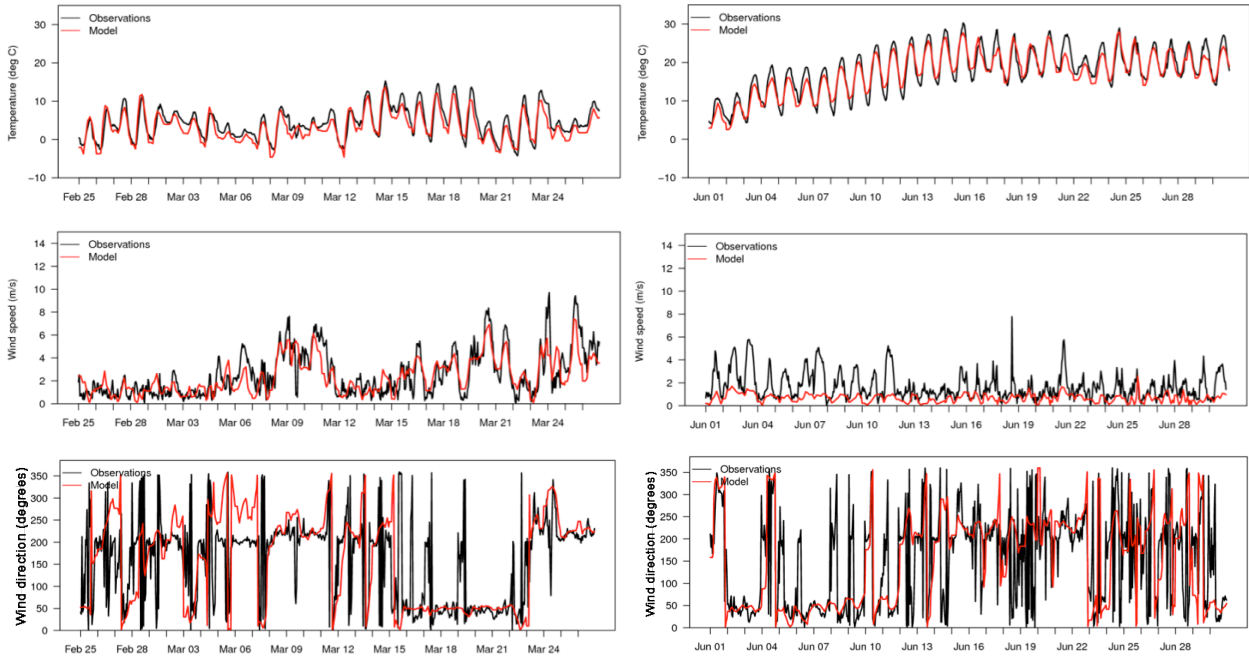

**Figure S3: Modelled (red) and measured (black) temperature, wind speed and wind direction for the cold season in Feb-Mar 2009 (left) and the warm season in June 2006 (right) in Payerne, Switzerland.**

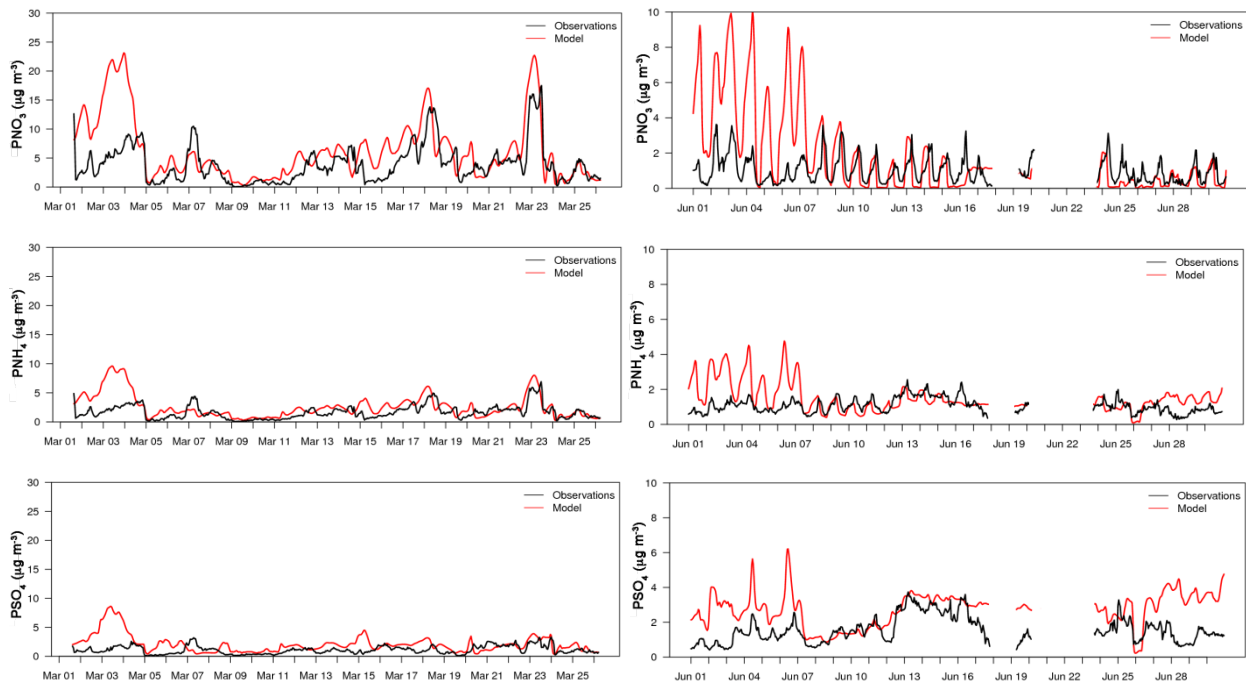

**Figure S4: Modelled (red) and measured (black) nitrate (PNO<sub>3</sub>), ammonium (PNH<sub>4</sub>) and sulfate (PSO<sub>4</sub>) for the cold season in Mar 2009 (left) and the warm season in June 2006 (right) in Payerne, Switzerland.**

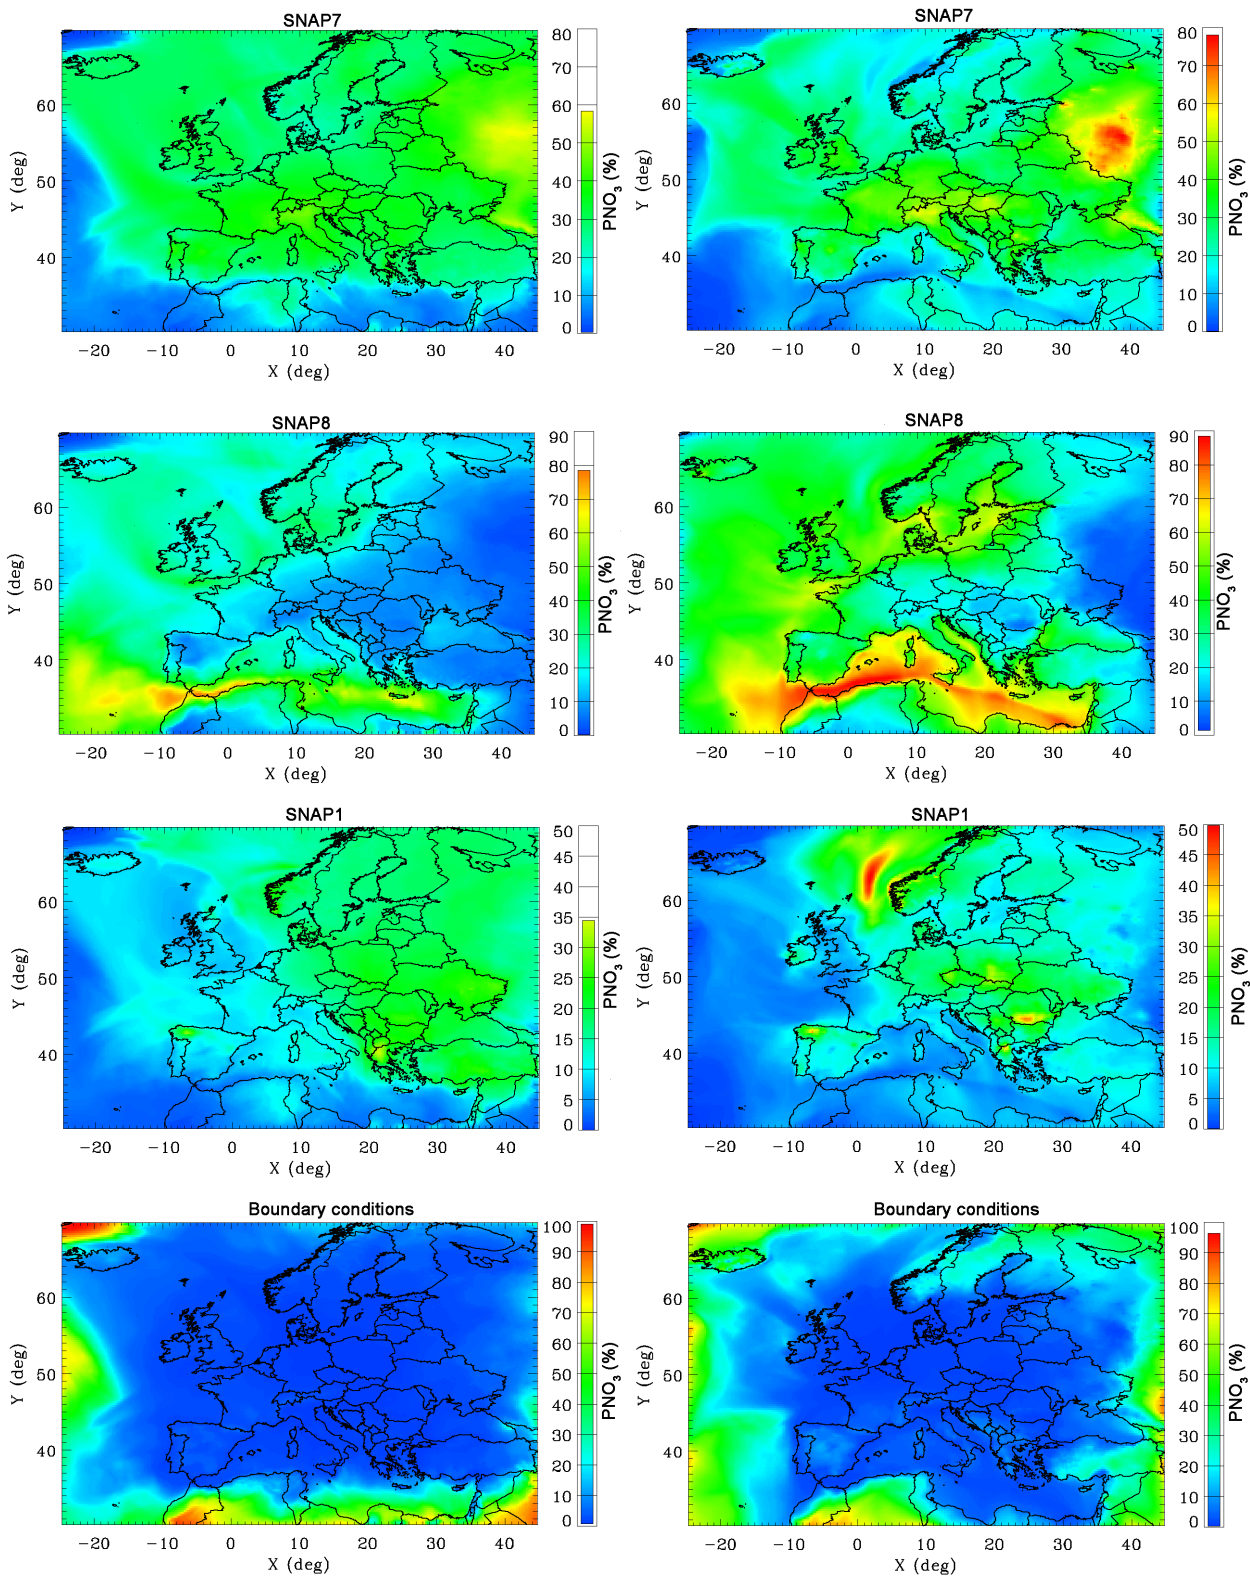

**Figure S5: Relative contributions to PNO<sub>3</sub> from road transport (SNAP7), ships (SNAP8), combustion in energy and transformation industries (SNAP1) and boundary conditions in February-March 2009 (left) and in June 2006 (right).**

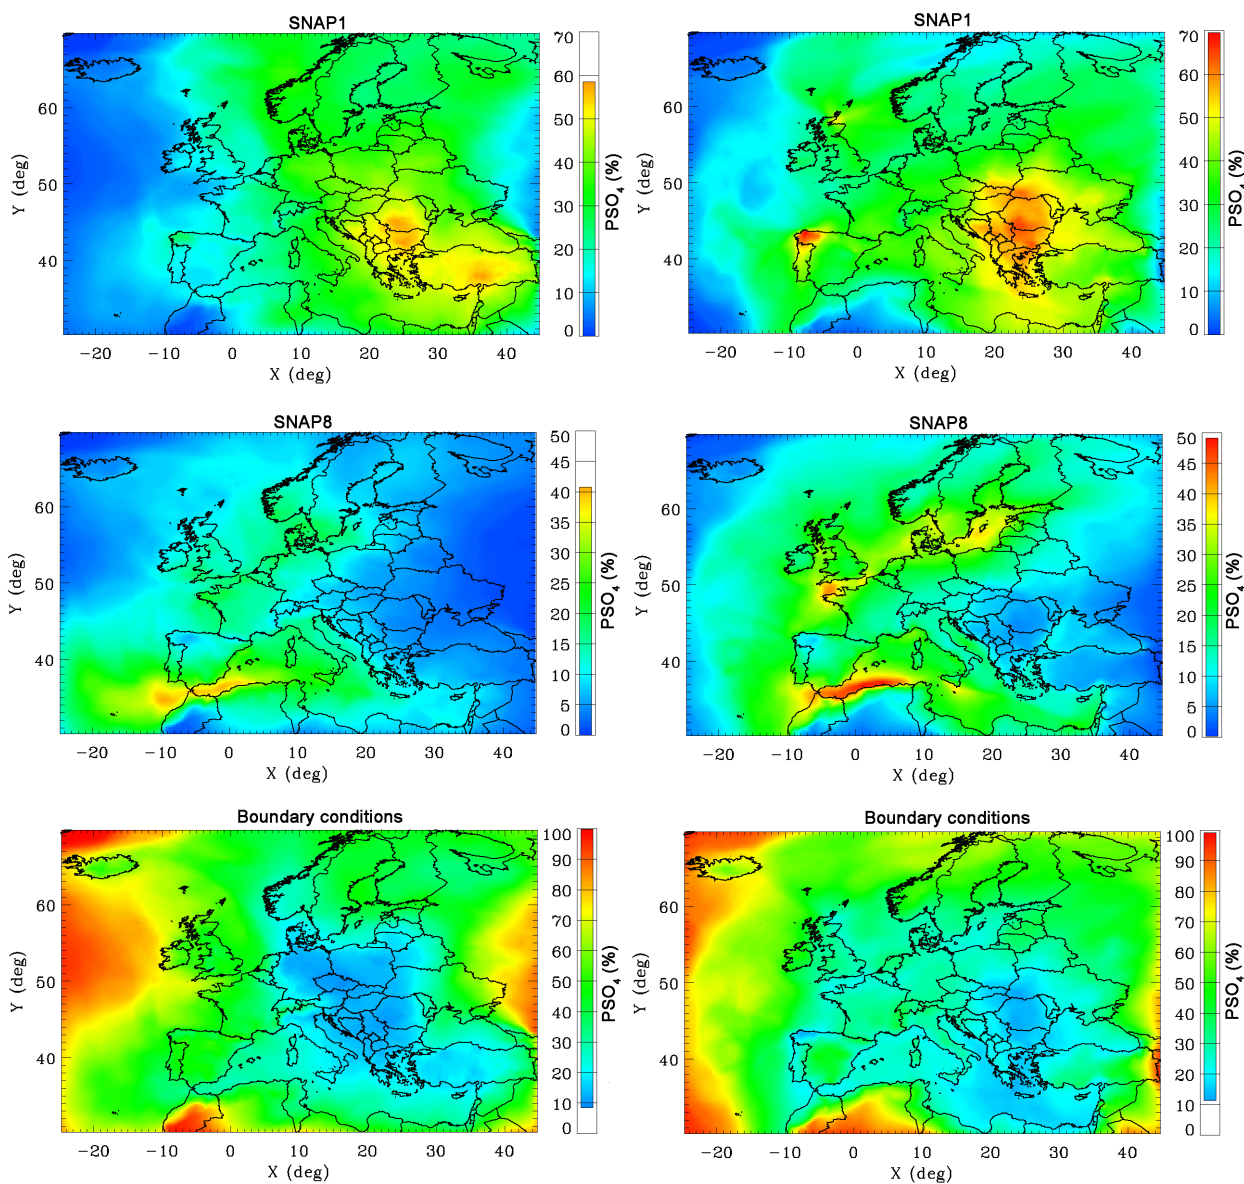

**Figure S6: Relative contributions to  $PSO_4$  from combustion in energy and transformation industries (SNAP1), ships (SNAP8) and boundary conditions in February-March 2009 (left) and in June 2006 (right).**

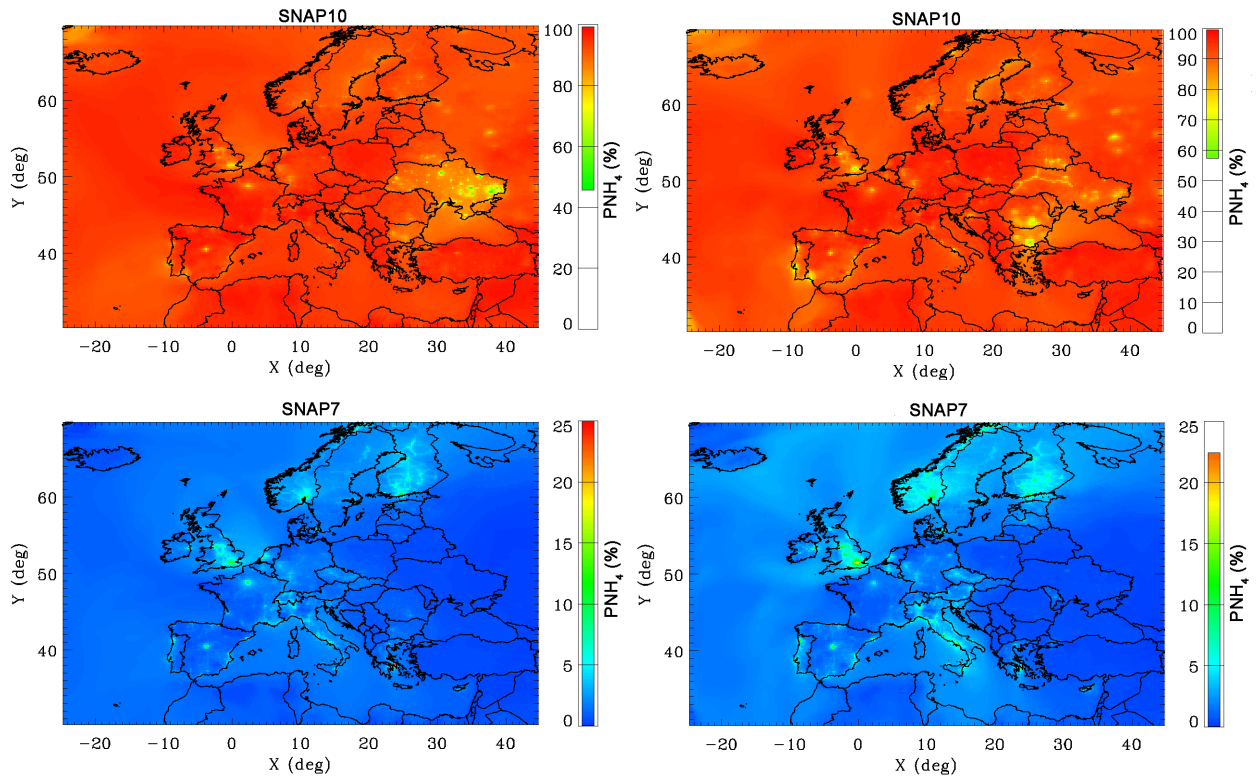

**Figure S7: Relative contributions to PNH<sub>4</sub> from agriculture (SNAP10) and road transport (SNAP7) in February-March 2009 (left) and in June 2006 (right).**

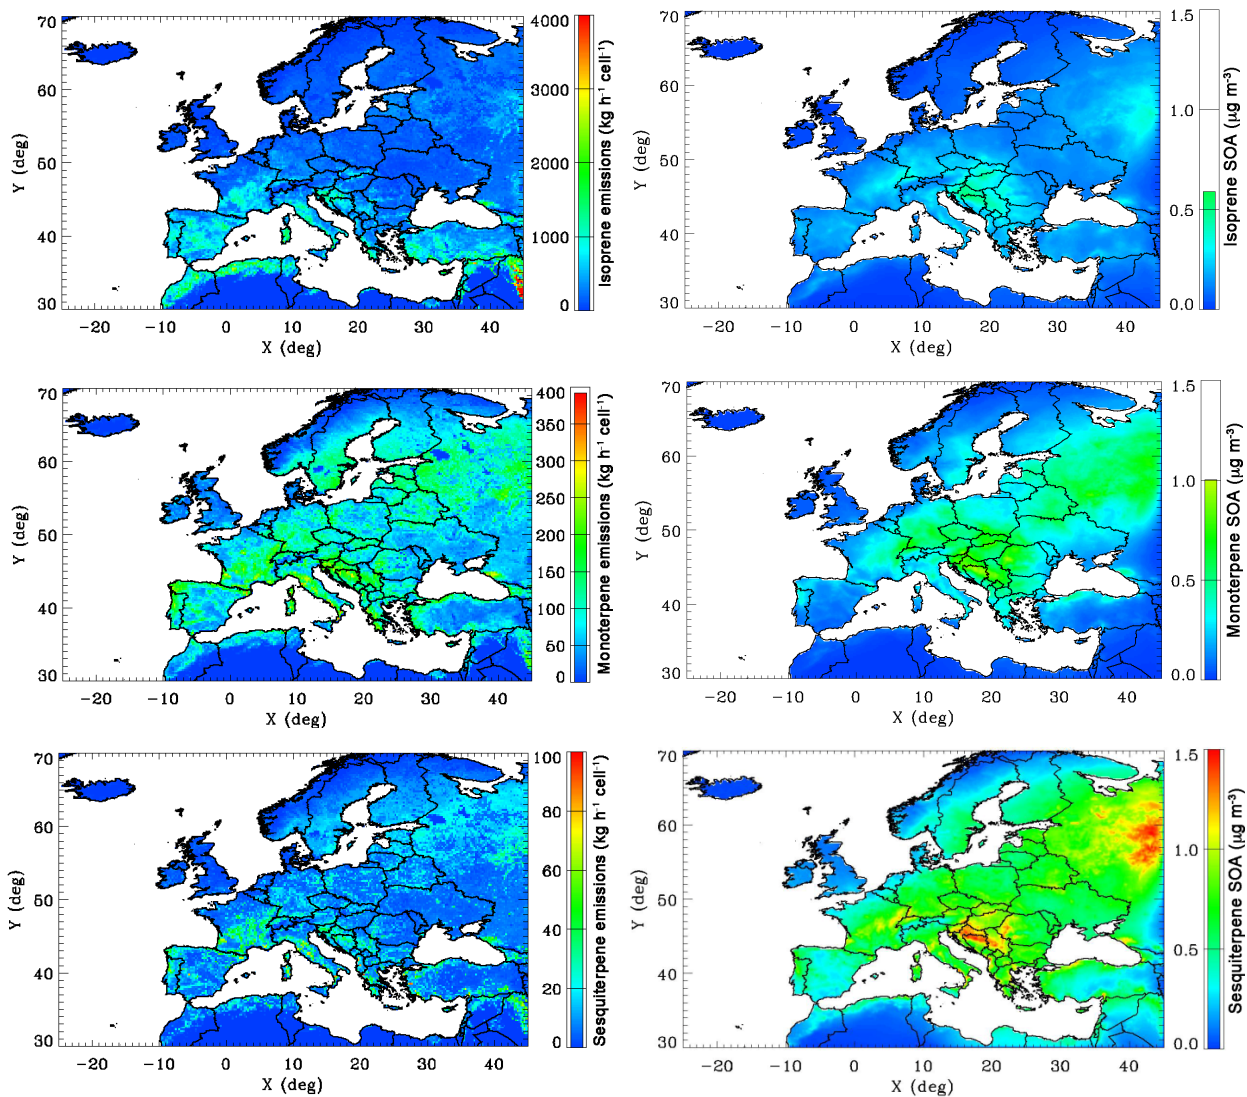

Figure S8: Monthly average emissions of biogenic species (left) and their SOA products (right); isoprene (top), monoterpenes (middle) and sesquiterpenes (bottom) in June 2006.



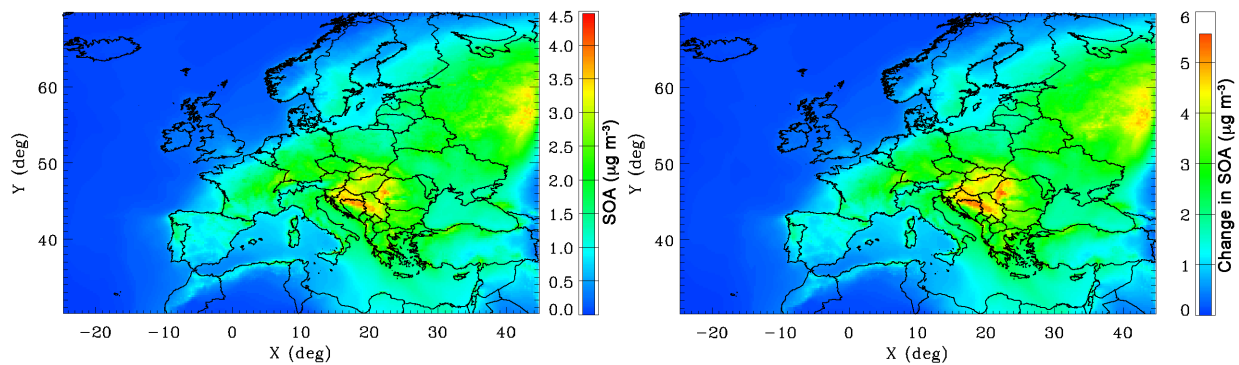

Figure S9: Total SOA concentrations in the base case (left) and changes in SOA when BVOC emissions were doubled in June 2006.

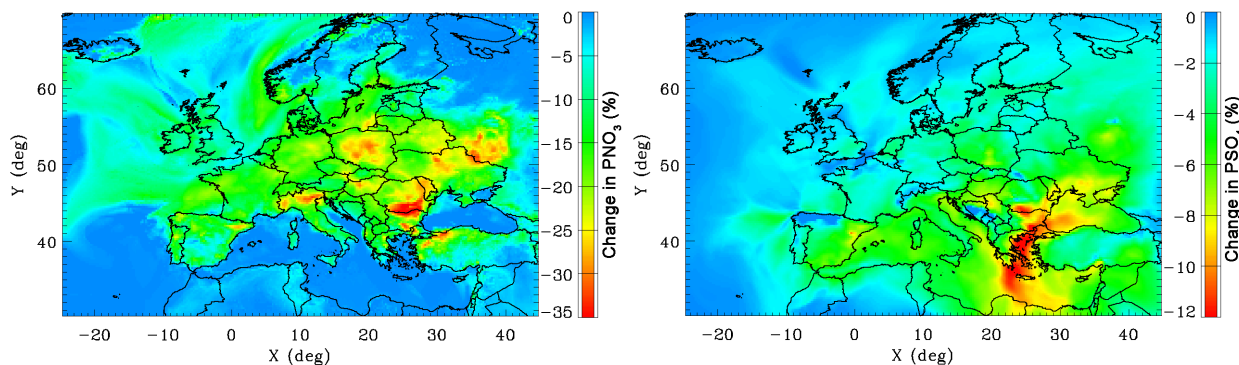

Figure S10: Relative changes in PNO<sub>3</sub> (left) and PSO<sub>4</sub> (right) concentrations in June 2006 when BVOC emissions were doubled.
